# Supplementary material for: A novel exopolysaccharide elicitor from endophytic fungus Gilmaniella sp. AL12 on volatile oils accumulation in Atractylodes lancea
Source: PubMed Central journal article supplement (PMC5050437; doi:10.1038/srep34735), 2016-10-05
Supplement: srep34735-s1.pdf [file srep34735-s1.pdf]

1 **Supplementary Information**

2

3 **A novel exopolysaccharide elicitor from endophytic fungus *Gilmaniella* sp. AL12 on volatile**  
4 **oils accumulation in *Atractylodes lancea***

5 Fei Chen<sup>#</sup>, Cheng-Gang Ren<sup>#</sup>, Tong Zhou, Yu-Jia Wei & Chuan-Chao Dai<sup>\*</sup>

6 Jiangsu Key Laboratory for Microbes and Functional Genomics, Jiangsu Engineering and

7 Technology Research Center for Industrialization of Microbial Resources, College of Life Sciences,

8 Nanjing Normal University, Nanjing 210023, China.

9 <sup>#</sup>Fei Chen and Cheng-Gang Ren contributed equally to this work.

10 <sup>\*</sup>Corresponding authors:

11 Chuan-Chao Dai, Tel/Fax: +86-25-85891382, E-mail: [daichuanchao@njnu.edu.cn](mailto:daichuanchao@njnu.edu.cn).

12

13

14

15

16

17

18

19

20

21

22

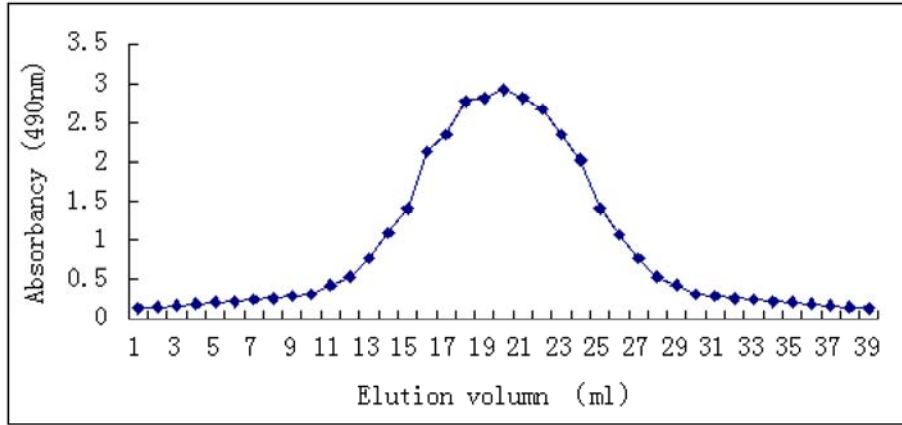

1

2 **Figure S1.** The elution curve of crude polysaccharides isolated from *Gilmaniella* sp. AL12 on a  
3 molecular sieve gel chromatography column (Sephacryl CL-4B, 1.6 × 100 cm) eluted with the 0.15  
4 mol.L<sup>-1</sup> NaCl aqueous solutions at a flow rate of 0.2 mL.min<sup>-1</sup>.

5

6

7

8

9

10

11

12

13

14

15

16

17

18

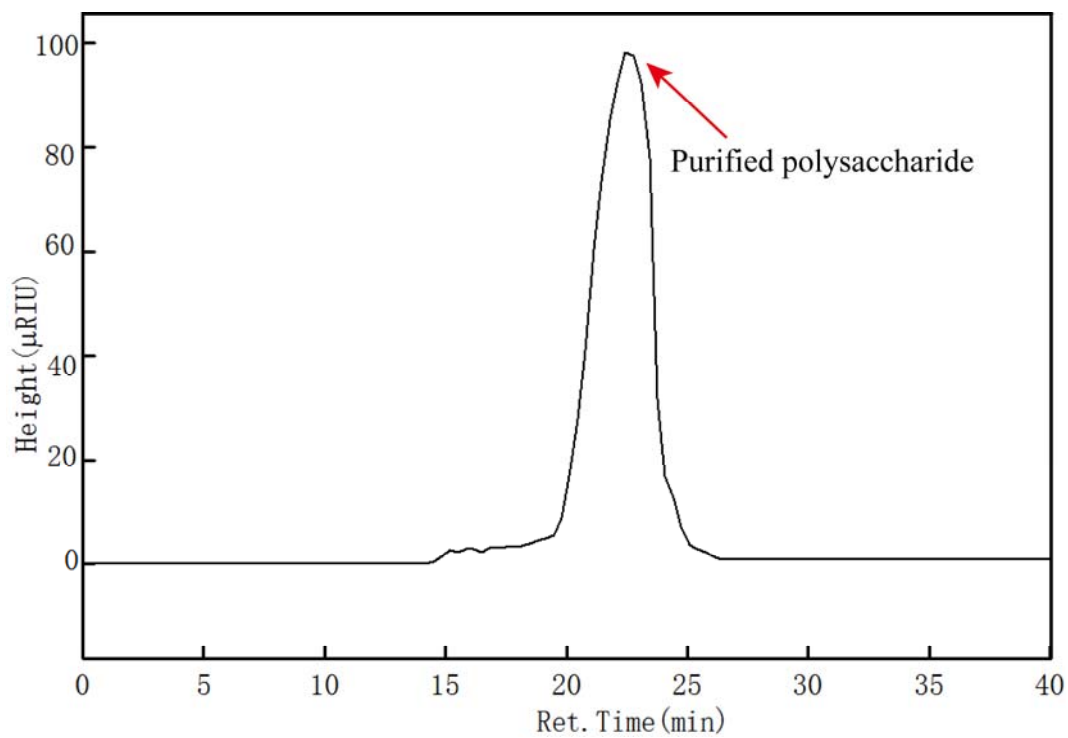

1

2 **Figure S2.** The purity identification of the polysaccharide from *Gilmaniella* sp. AL12 was  
3 measured by gel permeation chromatography (GPC) on a TSKgel G3000PWXL column.

4

5

6

7

8

9

10

11

12

13

14

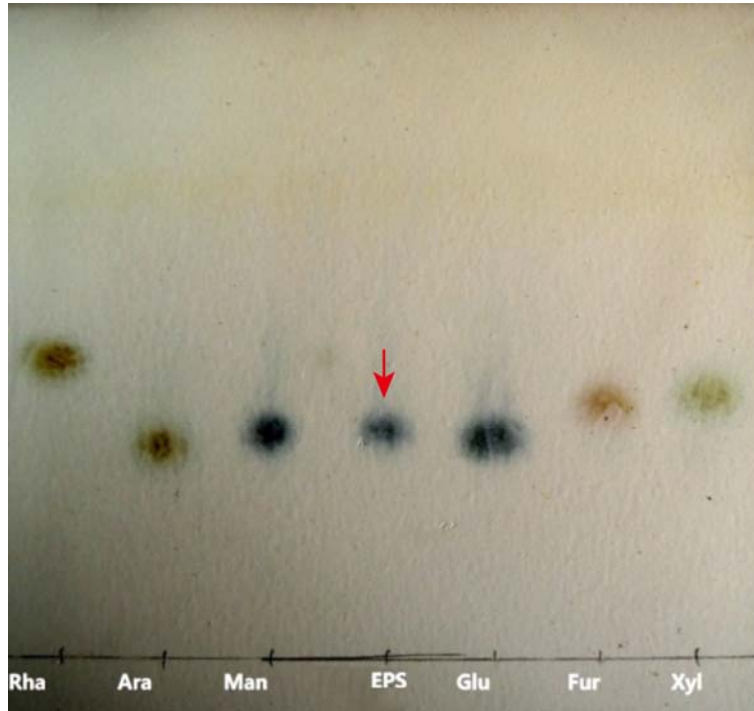

1

2 **Figure S3.** TLC results of hydrolyzed monosaccharide and standard monosaccharides. The Rf value  
3 and color of monosaccharide: EPS-0.29, dark blue. Rha-0.35, brown. Ara-0.276, brown. Man-0.29,  
4 dark blue. Glu-0.278, dark blue. Fur-0.32, brown. Xyl-0.33, green. EPS stands for hydrolyzed  
5 monosaccharide of purified exopolysaccharide from *Gilmaniella* sp. AL12, Rha stands for  
6 rhamnose standard monosaccharide, Ara stands for arabinose standard monosaccharide, Man stands  
7 for mannose standard monosaccharide, Glu stands for glucose standard monosaccharide, Fur stands  
8 for fucose standard monosaccharide. Xyl stands for xylose standard monosaccharide.

9

10

11

12

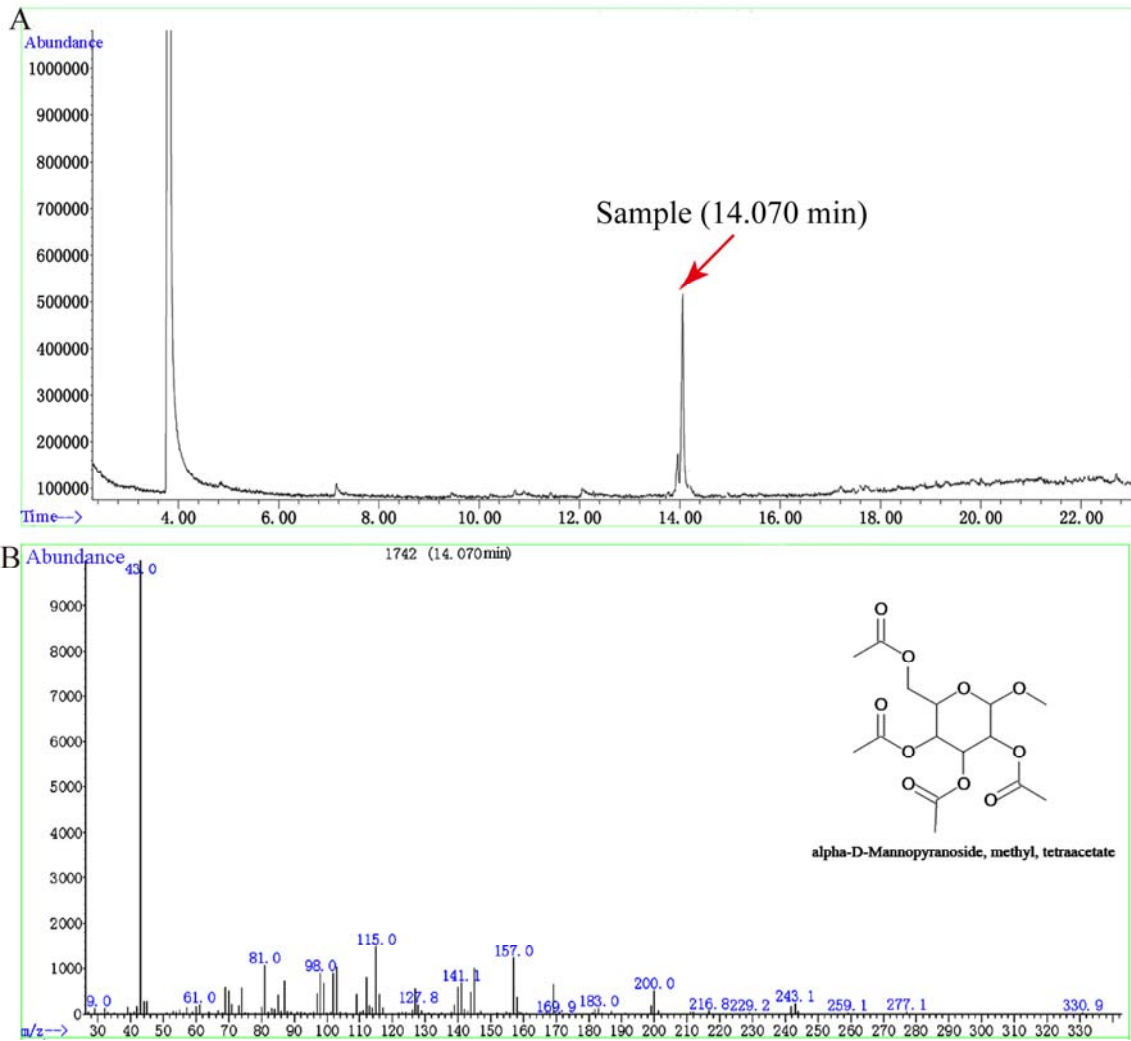

1

2 **Figure S4.** The GC-MS result of monosaccharide derivant from *Gilmaniella* sp. AL12 purified  
 3 exopolysaccharide. (A) Total ion gas chromatogram of sample; (B) Mass spectrogram of sample.

4

5

6

7

8

9

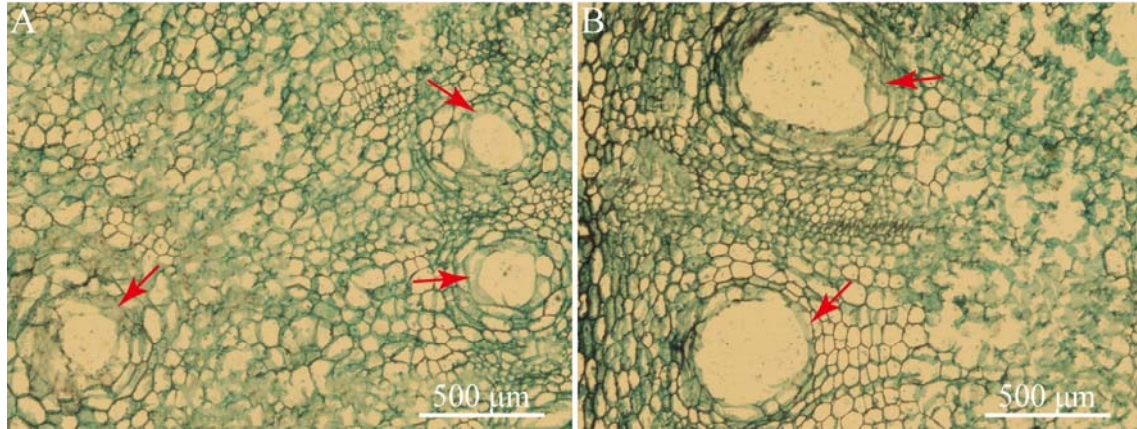

1

2 **Figure S5.** The effect of *A. lancea* rhizome oil cavities by *Gilmaniella* sp. AL12  
3 exopolysaccharides treatment. (A) The control group of which any component was not injected; (B)  
4 The experiment group of purified extracellular polysaccharides treated. The red arrows represent *A.*  
5 *lancea* rhizome oil cavities, they are volatile oils storage organs in rhizome of *A. lancea* plantlets.

6
